# Supplementary material for: GiOPARK Project: The Genetic Study of Parkinson’s Disease in the Croatian Population
Source: MDPI journal article supplement (doi:10.3390/genes15020255), 2024-02-19
Supplement: s1 [file s1]

Table S1. Gene panels used in the study.

|                                      |                                                                                                                                                                                                                                                                                                                                                                                                                                                                                                                                                                                                                                                                                                                                                                                                                                                                                                                      |
|--------------------------------------|----------------------------------------------------------------------------------------------------------------------------------------------------------------------------------------------------------------------------------------------------------------------------------------------------------------------------------------------------------------------------------------------------------------------------------------------------------------------------------------------------------------------------------------------------------------------------------------------------------------------------------------------------------------------------------------------------------------------------------------------------------------------------------------------------------------------------------------------------------------------------------------------------------------------|
| Parkinson's disease panel v1.68      | ATP13A2, ATP1A3, C19orf12, CSF1R, DCTN1, DNAJC6, FBXO7, FTL, GBA, GCH1, GRN, LRRK2, LYST, MAPT, OPA3, PANK2, PARK7, PINK1, PLA2G6, PRKN, PRKRA, PTRHD1, RAB39B, SLC30A10, SLC39A14, SLC6A3, SNCA, SPG11, SPR, SYNJ1, TH, TUBB4A, VPS13A, VPS35, WDR45, CHCHD2, TAF1 and NR2A4.                                                                                                                                                                                                                                                                                                                                                                                                                                                                                                                                                                                                                                       |
| Neurodegenerative disease panel v2.4 | ABCD1, AFG3L2, ALS2, ANG, ANXA11, APP, ARSA, ATP13A2, ATP1A3, ATP7B, AUH, C19orf12, CACNA1G, CCNF, CHCHD10, CHCHD2, CHMP2B, CLCN2, CLN6, COASY, CP, CSF1R, CTSF, CYP27A1, CYP7B1, DARS2, DCTN1, DNAJC5, DNAJC6, DNMT1, EIF2B1, EIF2B2, EIF2B3, EIF2B4, EIF2B5, ELOVL4, EPM2A, FBXO7, FIG4, FTL, FUS, GCH1, GFAP, GRN, HEXA, HEXB, HNRNPA1, HTRA1, ITM2B, KCNC3, KCND3, MYORG, KIF5A, LRRK2, LYST, MAPT, NHLRC1, NOTCH3, NPC1, NPC2, OPTN, PANK2, PARK7, PDGFB, PDGFRB, PFN1, PINK1, PLA2G6, PRKN, PRNP, PSEN1, PSEN2, RNF216, SETX, SLC20A2, SNCA, SOD1, SPAST, SPG11, SQSTM1, SYNJ1, TARDBP, TBK1, TMEM240, TREM2, TTC19, TYROBP, UBQLN2, VAPB, VCP, VPS13A, VPS35, WDR45, XPR1, AP5Z1, ARHGEF28, ATP2B3, ATP6AP2, CCDC88C, CIZ1, COQ2, DAO, DNAJC13, EIF4G1, ERBB4, EWSR1, GBA, GCDH, GIGYF2, HNRNPA2B1, MARS2, MATR3, NEK1, NR4A2, PRKRA, PRPH, SIGMAR1, SLC30A10, SNCB, SS18L1, TAF1, TUBA4A, TUBB4A and VPS13C. |

Table S2. List including variants of unknown significance, likely benign and benign variants.

| Gene (transcript)          | Variant   | Class | Tot. | EO | FO | SO | Patient ID |
|----------------------------|-----------|-------|------|----|----|----|------------|
| <i>GBA</i> (NM_000157.4)   | c.882T>G  | VUS   | 1    | 0  | 0  | 1  | PT074      |
| <i>ITM2B</i> (NM_021999.5) | c.711T>G  | VUS   | 1    | 0  | 0  | 1  | PT068      |
| <i>LRRK2</i> (NM_198578.4) | c.3705G>T | VUS   | 1    | 1  | 0  | 0  | PT022      |
|                            | c.2576G>T | VUS   | 1    | 0  | 1  | 0  | PT006      |
|                            | c.356T>C  | LB    | 1    | 1  | 0  | 0  | PT107      |

|                                    |                 |            |   |   |   |   |                 |
|------------------------------------|-----------------|------------|---|---|---|---|-----------------|
|                                    | c.1918G>T       | LB         | 1 | 1 | 0 | 0 | PT049           |
| <i>ATP13A2</i><br>(NM_001141974.3) | c.58A>C (HET)   | VUS        | 1 | 1 | 0 | 0 | PT065           |
|                                    | c.3188C>A (HET) | VUS        |   |   |   |   |                 |
|                                    | c.3278T>C (HET) | VUS        | 1 | 0 | 1 | 0 | PT010           |
|                                    | c.1744G>A (HET) | VUS        |   |   |   |   |                 |
|                                    | c.1634G>A (HET) | VUS        | 1 | 0 | 0 | 1 | PT077           |
|                                    | C25G>T (HET)    | VUS        | 1 | 0 | 1 | 0 | PT035           |
|                                    | c.2836A>T (HET) | LB         | 2 | 0 | 0 | 2 | PT031,<br>PT081 |
|                                    | c.3361A>T (HET) | B          | 2 | 0 | 0 | 2 | PT017,<br>PT097 |
| <i>SNCA</i> (NM_000345.3)          | c.44T>C         | VUS        | 1 | 0 | 1 | 0 | PT038           |
| <i>VPS35</i> (NM_018206.6)         | c.1327A>G       | VUS        | 1 | 1 | 0 | 0 | PT020           |
| <i>CHCHD2</i><br>(NM_001320327)    | c.359A>G        | VUS        | 1 | 0 | 1 | 0 | PT055           |
| <i>ARSA</i> (NM_000487.6)          | c.542T>G        | P<br>(HET) | 1 | 1 | 0 | 0 | PT009           |
| <i>DNAJC13</i><br>(NM_001329126.2) | c.6148G>A       | LB         | 1 | 0 | 1 | 0 | PT035           |
|                                    | c.3569C>T       | VUS        | 1 | 0 | 0 | 1 | PT031           |
|                                    | c.3887A>G       | B          | 2 | 0 | 0 | 2 | PT052,<br>PT125 |
|                                    | c.2627C>G       | VUS        | 1 | 1 | 0 | 0 | PT134           |
|                                    | c.424C>G        | LB         | 1 | 0 | 0 | 1 | PT022           |
| <i>EIF4G1</i><br>(NM_001194946.2)  | c.4567T>G       | VUS        | 1 | 1 | 0 | 0 | PT142           |
|                                    | c.2651G>A       | VUS        | 1 | 0 | 0 | 1 | PT106           |
|                                    | c.1667C>T       | VUS        | 1 | 0 | 0 | 1 | PT076           |
|                                    | c.4085T>C       | LB         | 1 | 0 | 0 | 1 | PT047           |
| <i>GIGYF2</i><br>(NM_001103147.2)  | c.281T>C        | VUS        | 1 | 0 | 0 | 1 | PT043           |
|                                    | c.1433A>C       | B          | 2 | 0 | 0 | 2 | PT100,<br>PT116 |

|                             |                     |     |   |   |   |   |       |
|-----------------------------|---------------------|-----|---|---|---|---|-------|
|                             | c.3575A>G           | LB  | 1 | 1 | 0 | 0 | PT007 |
|                             | c.2447G>A           | LB  | 1 | 0 | 0 | 1 | PT137 |
| CCDC88C<br>(NM_001080414.4) | c.5231C>T           | VUS | 1 | 1 | 0 | 0 | PT061 |
|                             | c.5836C>T           | LB  |   |   |   |   |       |
|                             | c.1867G>T           | VUS | 1 | 0 | 0 | 1 | PT119 |
| DNMT1<br>(NM_001130823)     | c.935A>G            | VUS | 1 | 0 | 0 | 1 | PT110 |
|                             | c.2728G>T           | B   | 1 | 0 | 0 | 1 | PT079 |
| GRN (NM_002087.3)           | c.229G>A            | VUS | 1 | 0 | 0 | 1 | PT031 |
|                             | c.970G>A            | LB  | 1 | 0 | 0 | 1 | PT111 |
| KCNC3 (NM_004977.3)         | c.1706C>G           | VUS | 1 | 0 | 0 | 1 | PT056 |
|                             | c.811C>T            | VUS | 1 | 0 | 0 | 1 | PT003 |
|                             | c.2197C>A           | LB  | 1 | 1 | 0 | 0 | PT134 |
| ERBB4 (NM_005235.3)         | c.794C>T            | VUS | 1 | 1 | 0 | 0 | PT020 |
|                             | c.847T>C            | VUS | 1 | 0 | 0 | 1 | PT040 |
| GCDH (NM_000159.3)          | c.1262C>T (HET)     | VUS | 1 | 1 | 0 | 0 | PT019 |
| GCH1 (NM_000161.3)          | c.206C>T            | VUS | 1 | 0 | 0 | 1 | PT004 |
| GFAP (NM_001363846)         | c.85C>T             | LB  | 1 | 0 | 1 | 0 | PT050 |
| HRPNPA1<br>(NM_031157.4)    | c.692G>A            | VUS | 1 | 0 | 0 | 1 | PT135 |
| KIF5A (NM_004984.4)         | c.2263G>A           | VUS | 1 | 0 | 0 | 1 | PT057 |
|                             | c.1223G>A           | VUS | 1 | 1 | 0 | 0 | PT009 |
| NOTCH3<br>(NM_000435.3)     | c.2581G>C           | VUS | 1 | 1 | 0 | 0 | PT129 |
|                             | c.3691C>T           | LB  | 1 | 0 | 0 | 1 | PT077 |
| NPC1 (NM_000271.5)          | c.3206T>A (HET)     | VUS | 1 | 0 | 0 | 1 | PT133 |
| NPC2 (NM_006432)            | c.441+1G>A<br>(HOM) | LB  | 1 | 0 | 0 | 1 | PT126 |

|                                                                                                                                             |                      |     |   |   |   |   |                 |
|---------------------------------------------------------------------------------------------------------------------------------------------|----------------------|-----|---|---|---|---|-----------------|
| <i>NR4A2</i> (NM_006186.4)                                                                                                                  | c.1412A>C            | VUS | 1 | 1 | 0 | 0 | PT148           |
| <i>OPTN</i><br>(NM_001008211.1)                                                                                                             | c.476G>T             | VUS | 1 | 0 | 0 | 1 | PT003           |
| <i>PSEN1</i> (NM_000021.4)                                                                                                                  | c.323G>A             | VUS | 2 | 0 | 0 | 2 | PT003,<br>PT069 |
|                                                                                                                                             | c.1198G>A            | VUS | 1 | 1 | 0 | 0 | PT019           |
| <i>PDGFRB</i><br>(NM_002609.4)                                                                                                              | c.3296C>T            | VUS | 1 | 0 | 0 | 1 | PT001           |
| <i>RNF216</i> (NM_207111.4)                                                                                                                 | c.1224+2C>T<br>(HET) | VP  | 1 | 1 | 0 | 0 | PT093           |
| <i>SETX</i><br>(NM_001351528.2)                                                                                                             | C.967A>G<br>(HOM)    | VUS | 1 | 0 | 0 | 1 | PT077           |
|                                                                                                                                             | C.82G>A (HET)        | VUS | 1 | 1 | 0 | 0 | PT048           |
|                                                                                                                                             | C.2479A>G<br>(HET)   | LB  | 1 | 0 | 0 | 1 | PT013           |
|                                                                                                                                             | c.3229G>A (HET)      | LB  | 1 | 0 | 1 | 0 | PT130           |
|                                                                                                                                             | C.7369C>T (HET)      | B   | 1 | 0 | 0 | 1 | PT012           |
| <i>SETX</i> (NM_015046)                                                                                                                     | c.6842+15T>C         | LB  | 1 | 0 | 1 | 0 | PT006           |
| <i>SORL1</i> (NM_003105.5)                                                                                                                  | c.3050-13G>A         | VUS | 1 | 1 | 0 | 0 | PT088           |
|                                                                                                                                             | c.5110G>A            | LB  |   |   |   |   |                 |
| <i>TBK1</i> (NM_013254.4)                                                                                                                   | c.1277G>A            | VUS | 1 | 0 | 0 | 1 | PT094           |
| <i>THAP1</i> (NM_018105.2)                                                                                                                  | c.523C>T             | VUS | 1 | 1 | 0 | 0 | PT032           |
| <i>TREM2</i><br>(NM_001271821.2)                                                                                                            | c.606G>T             | LB  | 1 | 1 | 0 | 0 | PT067           |
| <i>VPS13C</i> (NM_020821.3)                                                                                                                 | c.5726A>T (HET)      | VUS | 1 | 0 | 0 | 1 | PT102           |
|                                                                                                                                             | c.7528C>T (HET)      | VUS | 1 | 0 | 0 | 1 | PT153           |
|                                                                                                                                             | c.1126T>C (HET)      | VUS | 2 | 0 | 0 | 2 | PT086,<br>PT016 |
| VUS = variant of unknown significance, LB = likely benign variant, B = benign variant, HET = Heterozygous variant, HOM = Homozygous variant |                      |     |   |   |   |   |                 |
